# Supplementary material for: CCN estimations at a high-altitude remote site: role of organic aerosol variability and hygroscopicity
Source: Copernicus journal article supplement (doi:10.5194/egusphere-2024-1059), 2024-05-21
Supplement: Supplementary file 1 [file egusphere-2024-1059-supplement.pdf]

## Supplementary material- Rejano et al. in prep

| Species  | $NH_4NO_3$ | $(NH_4)_2SO_4$ | $(NH_4)HSO_4$ | $H_2SO_4$ | eBC  |
|----------|------------|----------------|---------------|-----------|------|
| $\rho$   | 1.72       | 1.77           | 1.78          | 1.83      | 1.70 |
| $\kappa$ | 0.58       | 0.56           | 0.48          | 0.9       | 0    |

**Table S1.** Densities ( $\rho$ ) and hygroscopicity parameters ( $\kappa$ ) used in this study for inorganic species and eBC. These values are taken from Wu et al. (2016). The density and hygroscopicity for sulfuric acid are taken from Gysel et al. (2007) and Petters and Kreidenweis (2007), respectively.

| Parameter                |       | Mean | Median | STD  | P 25 | P 75 |
|--------------------------|-------|------|--------|------|------|------|
| $N_{tot}$ ( $cm^{-3}$ )  |       | 2409 | 1488   | 2370 | 636  | 3358 |
| $N_{nucl}$ ( $cm^{-3}$ ) |       | 768  | 282    | 1192 | 113  | 831  |
| $N_{Ait}$ ( $cm^{-3}$ )  |       | 1215 | 767    | 1139 | 326  | 1801 |
| $N_{acc}$ ( $cm^{-3}$ )  |       | 454  | 359    | 368  | 163  | 670  |
| $N_{CCN}$ ( $cm^{-3}$ )  | 0.20% | 321  | 276    | 216  | 145  | 465  |
|                          | 0.40% | 638  | 563    | 423  | 282  | 913  |
|                          | 0.60% | 813  | 713    | 531  | 359  | 1160 |
| $D_{crit}$ (nm)          | 0.20% | 111  | 109    | 21   | 95   | 126  |
|                          | 0.40% | 72   | 74     | 18   | 60   | 82   |
|                          | 0.60% | 58   | 60     | 16   | 46   | 66   |
| $\kappa$ (-)             | 0.20% | 0.22 | 0.18   | 0.12 | 0.13 | 0.25 |
|                          | 0.40% | 0.22 | 0.15   | 0.17 | 0.11 | 0.25 |
|                          | 0.60% | 0.20 | 0.13   | 0.19 | 0.09 | 0.24 |

**Table S2.** Statistical overview (mean, median, standard deviation, and percentiles 25 and 75) of physical parameters and activation properties at SS=0.2, 0.4 and 0.6 %.

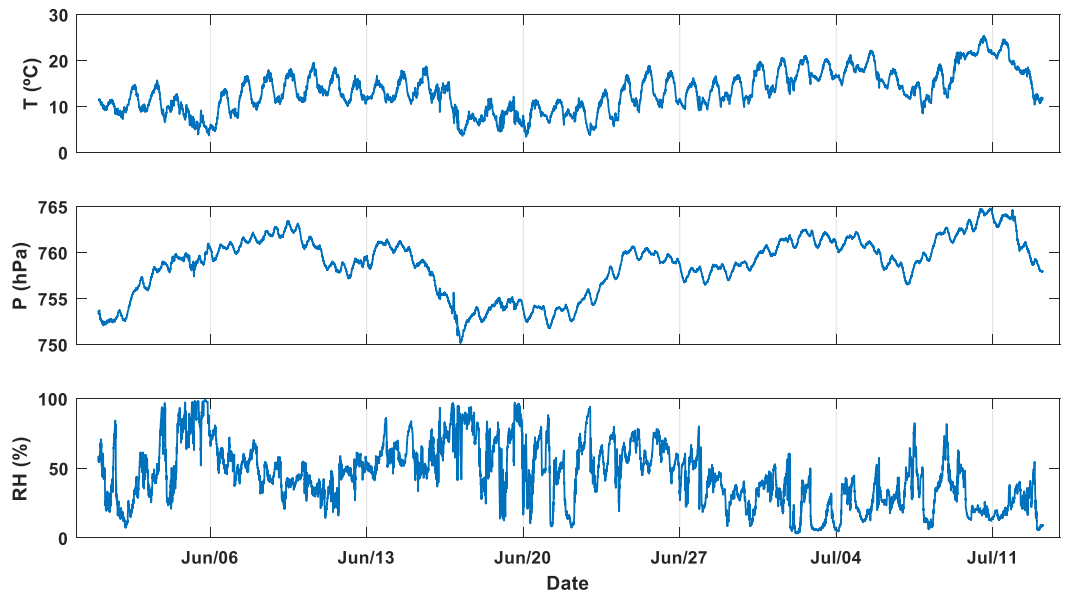

Figure S1. Time-series of temperature (T), pressure (P) and relative humidity (RH) along the campaign.

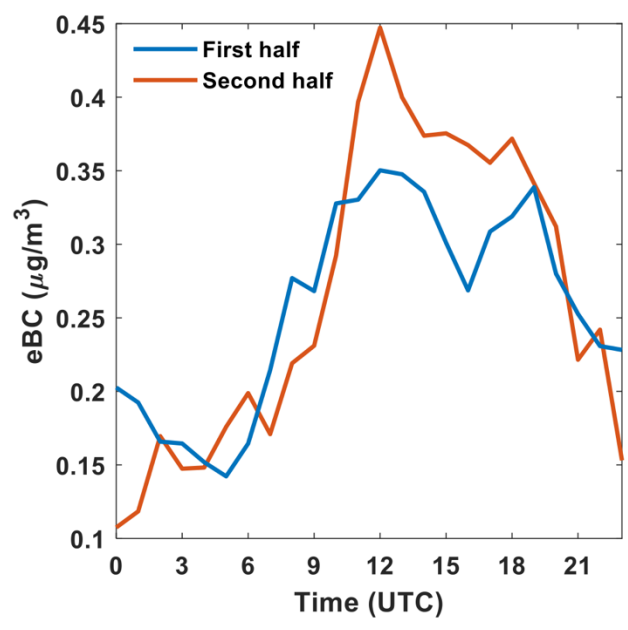

Figure S2. Mean diurnal evolution of of eBC mass concentration during the first and second half of the campaign. The black dash line represents the sampling station height.

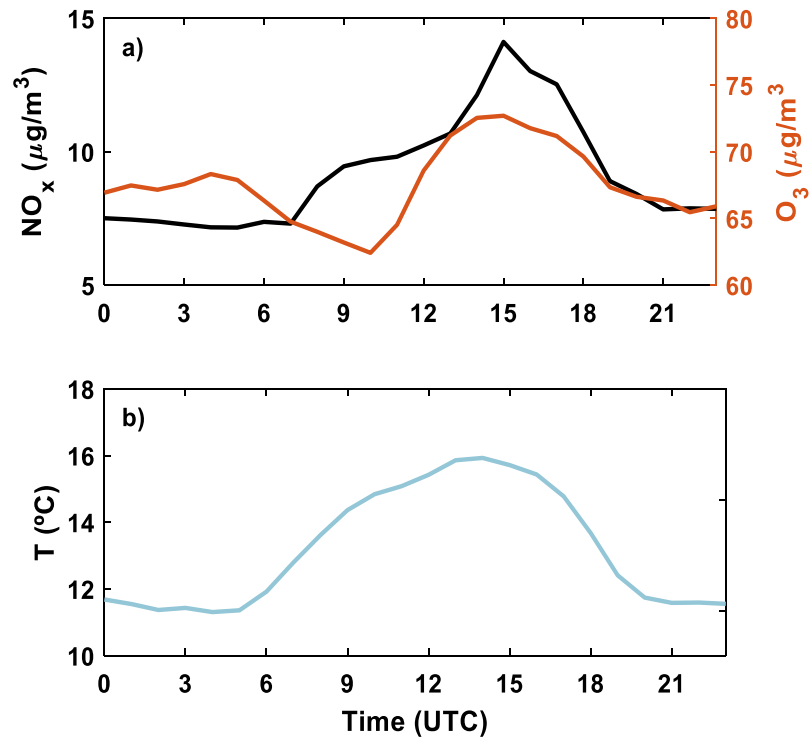

Figure S3. Mean diurnal evolution of a) NO<sub>x</sub> (left Y axis) and O<sub>3</sub> concentration (right Y axis) and b) temperature along the campaign

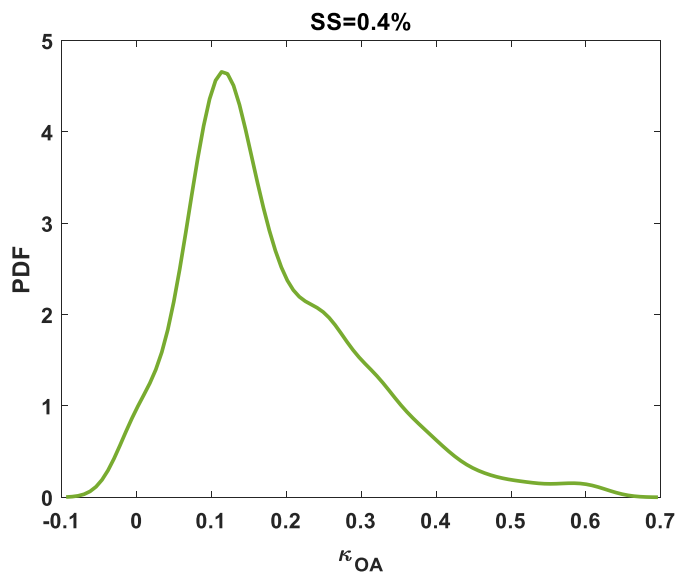

Figure S4. Probability density function (PDF) plot of  $\kappa_{OA}$  at SS=0.4%.
